# Supplementary material
Source: PubMed Central journal article supplement (PMC3674084)
Supplement: cc-12-1189-s01.pdf [file cc-12-1189-s01.pdf]

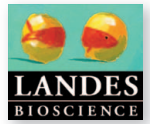

## **Supplemental Material to:**

**Martin Weinberger, Belém Sampaio-Marques, Paula Ludovico and William C. Burhans**

**DNA replication stress-induced loss of reproductive capacity in *S. cerevisiae* and its inhibition by caloric restriction**

**2013; 12(8)**

**<http://dx.doi.org/10.4161/cc.24232>**

**<http://www.landesbioscience.com/journals/cc/article/24232>**

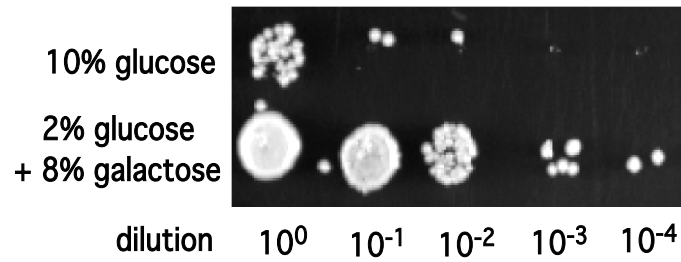

**Fig. S1. Excess galactose does not reduce the reproductive capacity of *gal1* $\Delta$  cells in stationary phase.** *gal1* $\Delta$  cells were cultured in SC medium prepared with 10% glucose or 2% glucose + 8% galactose and serial 10-fold dilutions were spotted on nutrient agar plates three days later.
